# Supplementary material for: Improved electrochemical performances of layered lithium rich oxide 0.6Li[Li1/3Mn2/3]O2·0.4LiMn5/12Ni5/12Co1/6O2 by Zr doping
Source: Royal Society of Chemistry journal article supplement (doi:10.1039/c5ra22330j), 2016-01-01
Supplement: c5ra22330j1.pdf [file c5ra22330j1.pdf]

## Supplementary data

**Fig.S1.** TEM images of  $0.6\text{Li}[\text{Li}_{1/3}\text{Mn}_{2/3(1-x)}\text{Zr}_{2/3x}]\text{O}_2 \cdot 0.4\text{LiMn}_{5/12}\text{Ni}_{5/12}\text{Co}_{1/6}\text{O}_2$  ( $x = 0$ ,  $x = 2\%$ ,  $x = 4\%$ ,  $x = 6\%$ ,  $x = 8\%$ ,  $x = 10\%$ ) samples.

Fig.S1

Fig.S2. XPS patterns for O 1s in  $0.6\text{Li}[\text{Li}_{1/3}\text{Mn}_{2/3}(1-x)\text{Zr}_{2/3x}]\text{O}_2 \cdot 0.4\text{LiMn}_{5/12}\text{Ni}_{5/12}\text{Co}_{1/6}\text{O}_2$  ( $0 \leq x \leq 10\%$ ) samples.

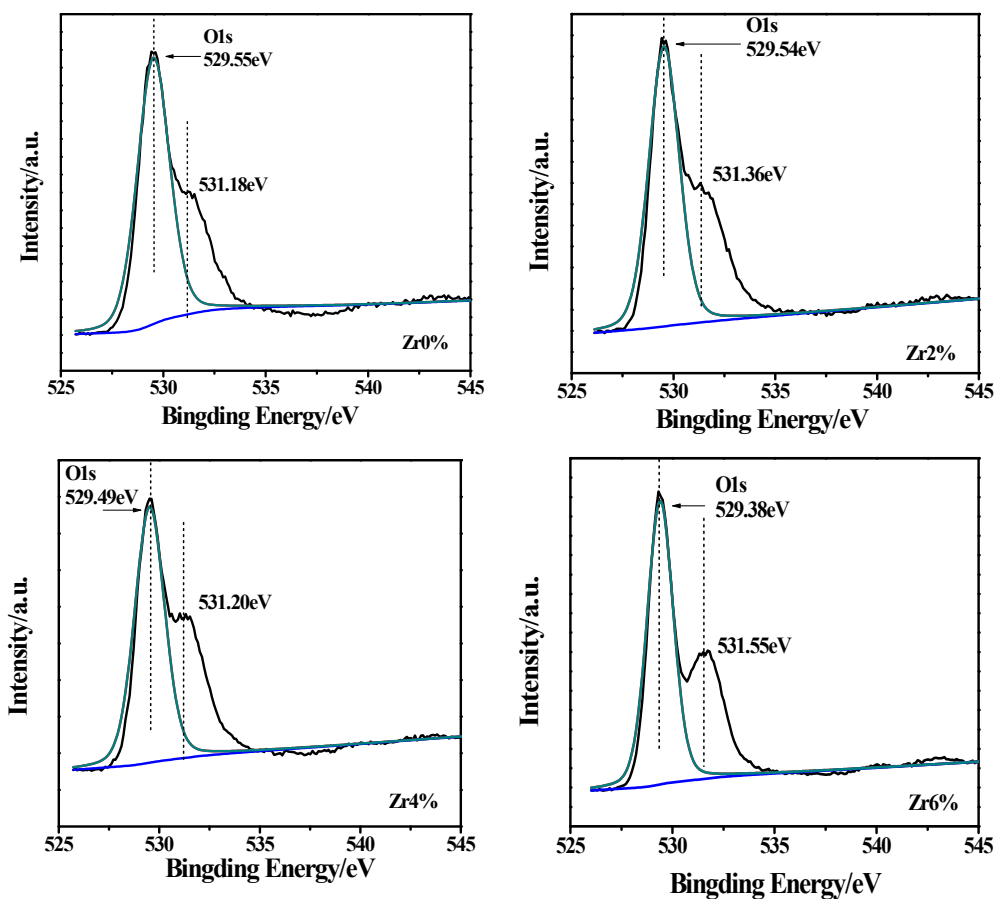

$x)\text{Zr}_{2/3x}]\text{O}_2 \cdot 0.4\text{LiMn}_{5/12}\text{Ni}_{5/12}\text{Co}_{1/6}\text{O}_2$  ( $0 \leq x \leq 10\%$ ) samples.

Fig.S2

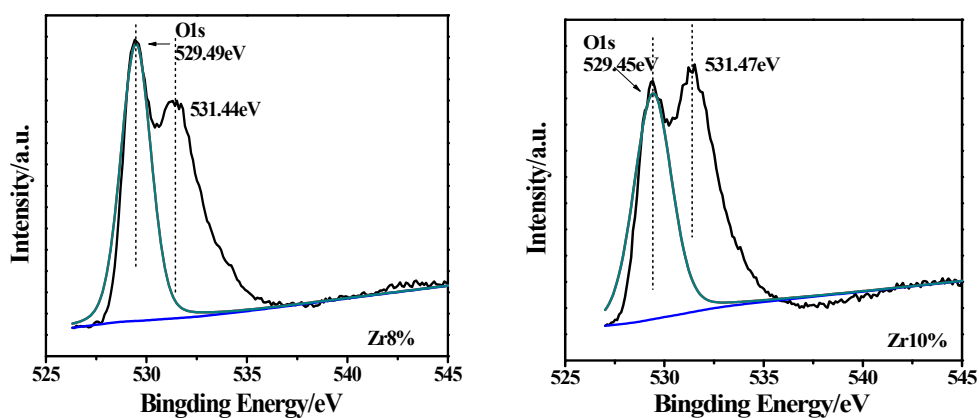

**Table S1** the relative  $\text{Ni}^{2+}/\text{Ni}^{3+}$  contents in  $0.6\text{Li}[\text{Li}_{1/3}\text{Mn}_{2/3}(1-x)\text{Zr}_{2/3x}]_2\text{O}_2 \cdot 0.4\text{LiMn}_{5/12}\text{Ni}_{5/12}\text{Co}_{1/6}\text{O}_2$  ( $0 \leq x \leq 10\%$ ) samples.

| Sample                          | Zr0% | Zr2% | Zr4% | Zr6% | Zr8% | Zr10% |
|---------------------------------|------|------|------|------|------|-------|
| $\text{Ni}^{2+}/\text{Ni}^{3+}$ | 1.37 | 1.33 | 1.31 | 1.30 | 1.29 | 1.25  |

$0.6\text{Li}[\text{Li}_{1/3}\text{Mn}_{2/3}(1-x)\text{Zr}_{2/3x}]_2\text{O}_2 \cdot 0.4\text{LiMn}_{5/12}\text{Ni}_{5/12}\text{Co}_{1/6}\text{O}_2$  ( $0 \leq x \leq 10\%$ ) samples.

**Table S2** the specific surface areas ( $S_A$ ) of  $0.6\text{Li}[\text{Li}_{1/3}\text{Mn}_{2/3}(1-x)\text{Zr}_{2/3x}]_2\text{O}_2 \cdot 0.4\text{LiMn}_{5/12}\text{Ni}_{5/12}\text{Co}_{1/6}\text{O}_2$  ( $0 \leq x \leq 10\%$ ) samples.

| Sample                        | Zr0% | Zr2% | Zr4% | Zr6% | Zr8% | Zr10% |
|-------------------------------|------|------|------|------|------|-------|
| $S_A/\text{m}^2\text{g}^{-1}$ | 3.79 | 3.97 | 4.14 | 4.30 | 3.88 | 3.87  |
